# Supplementary material for: Clinical, Epidemiological and Laboratory Features of Invasive Candida parapsilosis Complex Infections in a Brazilian Pediatric Reference Hospital during the COVID-19 Pandemic
Source: MDPI journal article supplement (doi:10.3390/jof9080844), 2023-08-13
Supplement: s1 [file s1]

Table S1. Microbiological characteristic of healthcare-associated infections occurred before or after invasive candidemia by CPC.

| Isolated microorganisms                                                                                                                                                                                                                                                           | <i>C. parapsilosis</i><br>(n=104) | <i>C. orthopsilosis</i><br>(n=17) | <i>C. metapsilosis</i><br>(n=3) |
|-----------------------------------------------------------------------------------------------------------------------------------------------------------------------------------------------------------------------------------------------------------------------------------|-----------------------------------|-----------------------------------|---------------------------------|
| <b>BEFORE CPC CANDIDEMIA<sup>Φ</sup></b>                                                                                                                                                                                                                                          |                                   |                                   |                                 |
| <i>Enterobacter cloacae</i> complex <sup>B</sup>                                                                                                                                                                                                                                  | 1                                 | 0                                 | 0                               |
| <i>Escherichia coli</i> <sup>C</sup>                                                                                                                                                                                                                                              | 1                                 | 0                                 | 0                               |
| <i>Proteus mirabilis</i> <sup>C</sup>                                                                                                                                                                                                                                             | 1                                 | 0                                 | 0                               |
| <i>S. capitis</i> <sup>B</sup>                                                                                                                                                                                                                                                    | 1                                 | 0                                 | 0                               |
| <i>S. epidermidis</i> <sup>B</sup>                                                                                                                                                                                                                                                | 1                                 | 0                                 | 0                               |
| <i>S. hominis</i> spp. <i>hominis</i> <sup>D</sup>                                                                                                                                                                                                                                | 1                                 | 0                                 | 0                               |
| <i>S. warneri</i> <sup>D</sup>                                                                                                                                                                                                                                                    | 1                                 | 0                                 | 0                               |
| <i>C. parapsilosis</i> complex <sup>D</sup>                                                                                                                                                                                                                                       | 0                                 | 1                                 | 0                               |
| <i>C. tropicalis</i> <sup>B</sup>                                                                                                                                                                                                                                                 | 1                                 | 0                                 | 0                               |
| <b>Polymicrobial infections<sup>μ</sup></b>                                                                                                                                                                                                                                       |                                   |                                   |                                 |
| <i>C. parapsilosis</i> complex <sup>B</sup> and <i>S. warneri</i> <sup>B</sup> ; <i>Elizabethkingia meningoseptica</i> <sup>F</sup> ; <i>K. pneumoniae</i> <sup>B</sup> ; <i>S. epidermidis</i> <sup>D</sup> (2x); and coagulase-negative <i>Staphylococcus</i> spp. <sup>D</sup> | 1                                 | 0                                 | 0                               |
| <i>K. pneumoniae</i> <sup>A</sup> ; and <i>P. aeruginosa</i> <sup>A</sup> ; <i>C. tropicalis</i> <sup>D</sup> ; and <i>S. epidermidis</i> <sup>D</sup>                                                                                                                            | 1                                 | 0                                 | 0                               |
| <i>C. parapsilosis</i> complex <sup>B, D, F</sup> ; and <i>K. pneumoniae</i> <sup>B</sup>                                                                                                                                                                                         | 1                                 | 0                                 | 0                               |
| <i>K. pneumoniae</i> <sup>B, D</sup> ; and <i>P. aeruginosa</i> <sup>C</sup>                                                                                                                                                                                                      | 1                                 | 0                                 | 0                               |
| <i>C. albicans</i> <sup>D</sup> ; and <i>S. epidermidis</i> <sup>B</sup>                                                                                                                                                                                                          | 1                                 | 0                                 | 0                               |
| <i>E. cloacae</i> complex <sup>B</sup> ; and <i>P. aeruginosa</i> <sup>A</sup>                                                                                                                                                                                                    | 1                                 | 0                                 | 0                               |
| <b>AFTER CPC CANDIDEMIA<sup>ε</sup></b>                                                                                                                                                                                                                                           |                                   |                                   |                                 |
| <i>C. parapsilosis</i> complex <sup>B, C</sup>                                                                                                                                                                                                                                    | 21                                | 4                                 | 0                               |
| <i>K. pneumoniae</i> <sup>B, C</sup> (3x and 2x)                                                                                                                                                                                                                                  | 4                                 | 0                                 | 0                               |
| <i>E. coli</i> <sup>C</sup>                                                                                                                                                                                                                                                       | 1                                 | 0                                 | 0                               |
| <i>S. epidermidis</i> <sup>B</sup>                                                                                                                                                                                                                                                | 1                                 | 0                                 | 0                               |
| <b>Polymicrobial infections<sup>μ</sup></b>                                                                                                                                                                                                                                       |                                   |                                   |                                 |
| <i>K. pneumoniae</i> <sup>A</sup> and <i>P. aeruginosa</i> <sup>A</sup> ; <i>C. parapsilosis</i> complex <sup>B</sup> ; <i>K. oxytoca</i> <sup>G</sup> ; <i>P. aeruginosa</i> <sup>B</sup> ; and <i>S. epidermidis</i> <sup>B, D</sup>                                            | 1                                 | 0                                 | 0                               |
| <i>C. parapsilosis</i> complex <sup>B</sup> ; <i>C. tropicalis</i> <sup>B, D</sup> and <i>K. pneumoniae</i> <sup>D</sup>                                                                                                                                                          | 1                                 | 0                                 | 0                               |
| <i>K. pneumoniae</i> <sup>D</sup> ; and <i>P. aeruginosa</i> <sup>D</sup> (2x); <i>C. parapsilosis</i> complex <sup>D</sup> ; and <i>K. pneumoniae</i> <sup>D</sup> (2x)                                                                                                          | 1                                 | 0                                 | 0                               |
| <i>C. parapsilosis</i> complex <sup>B, D</sup> ; <i>S. epidermidis</i> <sup>D</sup> ; and <i>Stenotrophomonas maltophilia</i> <sup>C</sup>                                                                                                                                        | 1                                 | 0                                 | 0                               |
| <i>C. glabrata</i> <sup>C</sup> ; and <i>C. parapsilosis</i> complex <sup>B, C, E</sup>                                                                                                                                                                                           | 1                                 | 0                                 | 0                               |
| <i>C. parapsilosis</i> complex <sup>D</sup> ; and <i>Pseudomonas</i> spp. <sup>C</sup> (> 10 <sup>6</sup> cfu/mL)                                                                                                                                                                 | 1                                 | 0                                 | 0                               |
| <i>C. parapsilosis</i> complex <sup>D</sup> (3x); and SARS-CoV-2 <sup>E</sup>                                                                                                                                                                                                     | 1                                 | 0                                 | 0                               |

|                                                                                                    |   |   |   |
|----------------------------------------------------------------------------------------------------|---|---|---|
| <i>C. parapsilosis</i> complex <sup>D</sup> and <i>S. hominis</i> spp. <i>hominis</i> <sup>B</sup> | 1 | 0 | 0 |
| <i>K. pneumoniae</i> <sup>C</sup> ; and <i>P. aeruginosa</i> <sup>C</sup> (2x)                     | 1 | 0 | 0 |

<sup>Ⓛ</sup> Isolates recovered at any time during hospitalization, before the diagnosis of CPC candidemia / deep-seated infection

<sup>Ⓜ</sup> Isolates recovered on the same day

<sup>Ⓝ</sup> Isolates recovered up to 30 days after incident CPC candidemia / deep-seated infection

<sup>A C</sup>: Tracheal aspirate < 10<sup>6</sup> cfu/mL

<sup>B D</sup>: Catheter-drawn blood

<sup>D E</sup>: Peripheral blood

<sup>C F</sup>: Urine < 10<sup>6</sup> cfu/mL

<sup>E G</sup>: Nasopharyngeal swab

<sup>F H</sup>: Catheter tip

<sup>G I</sup>: Rectal swab
